# Supplementary material
Source: Springer Nature journal article supplement (https://www.springermedizin.de/resource/supplementary/13098_2012_189_MOESM1_ESM.pdf/9670688)

**A****HbA1c (%)**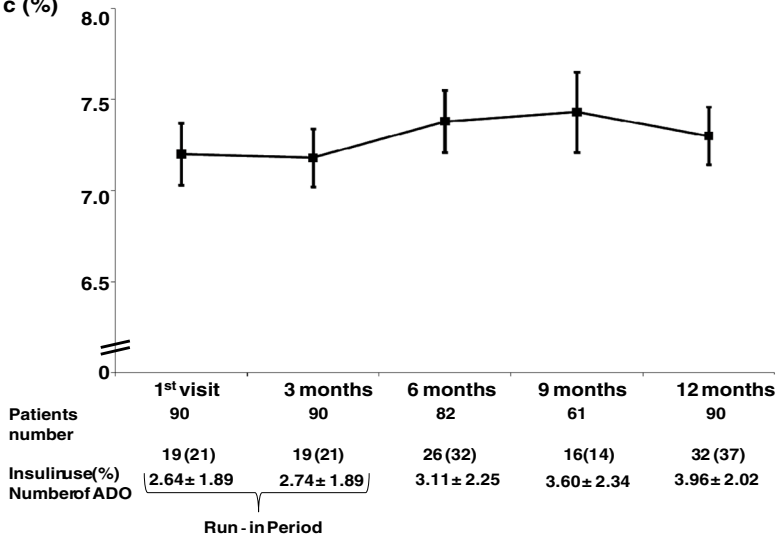**B****HbA1c (%)**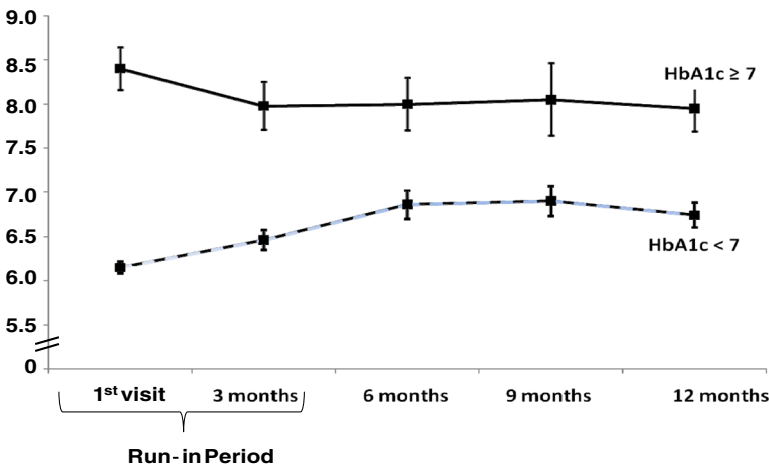

Supplement: MOESM1 [file 9670688]
